# Supplementary material for: Effective Clinical Pathway Improves Interprofessional Collaboration and Reduces Antibiotics Prophylaxis Use in Orthopedic Surgery in Hospitals in Indonesia
Source: MDPI journal article supplement (doi:10.3390/antibiotics11030399), 2022-03-16
Supplement: s1 [file s1]

Table S1. Indonesian version of CPAT questionnaire

| Statement                                                                                                                                                                                                                                         |
|---------------------------------------------------------------------------------------------------------------------------------------------------------------------------------------------------------------------------------------------------|
| Relationships among members                                                                                                                                                                                                                       |
| 1. Anggota tim memiliki kepercayaan terhadap pekerjaan dan kontribusi setiap anggota dalam hubungannya dengan pelayanan pasien/klien.<br>Team members have confidence in the work and contribution of each member concerning patient/client care. |
| 2. Anggota tim menghormati peran dan keahlian masing-masing.<br>Team members respect each other's roles and skills.                                                                                                                               |
| 3. Tingkat saling menghormati dalam tim kami dapat meningkatkan kemampuan kami untuk bekerja sama.<br>The mutual respect level in our team can enhance our ability to work together.                                                              |
| 4. Anggota tim peduli terhadap kesejahteraan satu sama lain.<br>Team members care about each other's well-being.                                                                                                                                  |
| 5. Bekerja dengan anggota tim lainnya merupakan hal yang menyenangkan.<br>Working with other team members is lively.                                                                                                                              |
| 6. Kegiatan kebersamaan dapat meningkatkan efektivitas kerja tim.<br>Doing daily activities together can increase the effectiveness of teamwork.                                                                                                  |
| 7. Saling menghormati antara anggota tim meningkatkan kemampuan kami untuk bekerja sama.<br>Mutual respect between team members enhances our ability to work together.                                                                            |
| 8. Bekerja secara kolaboratif membuat sebagian besar anggota tim antusias dan tertarik terhadap pekerjaan mereka.<br>Working collaboratively makes most team members enthusiastic and interested in their work.                                   |
| 9. Pemimpin tim kami mendorong setiap anggota untuk berpraktik dalam seluruh lingkup profesional mereka.<br>Our team leaders encourage each member to practice within their entire professional scope.                                            |
| Barriers in team collaboration                                                                                                                                                                                                                    |
| 10. Kepemimpinan dalam tim menghambat para profesional untuk mengambil inisiatif dalam usaha mencapai tujuan pelayanan pasien/klien.<br>Team leadership hinders professionals from taking the initiative to achieve patient/client service goals. |
| 11. Pemimpin tim kami tidak memperhatikan kekhawatiran dan persepsi anggota tim.                                                                                                                                                                  |

|                                                                                                                                                                                                                                                                                                          |
|----------------------------------------------------------------------------------------------------------------------------------------------------------------------------------------------------------------------------------------------------------------------------------------------------------|
| Our team leader unconcerns and inattentive the perceptions of team members.                                                                                                                                                                                                                              |
| 12. Anggota tim merasa otonomi mereka terbatas dalam perawatan pasien/klien yang dapat mereka berikan.<br>Team members feel their autonomy is limited in the patient/client care they can provide.                                                                                                       |
| 13. Ketidaksetujuan antar anggota tim diabaikan atau dihindari.<br>Disagreements between team members are ignored or avoided.                                                                                                                                                                            |
| 14. Tim kami memiliki proses yang baku dalam manajemen konflik.<br>Our team has a standard procedure in conflict management.                                                                                                                                                                             |
| Team relationships with the community                                                                                                                                                                                                                                                                    |
| 15. Tim kami telah membentuk kemitraan dengan organisasi masyarakat untuk mewujudkan luaran pasien/klien yang lebih baik.<br>Our team has formed partnerships with community organizations to achieve better patient/client outcomes.                                                                    |
| 16. Tim kami memiliki cara untuk mengoptimalkan koordinasi pelayanan pasien/klien dengan lembaga pelayanan masyarakat.<br>Our team has a way of optimizing the coordination of patient/client care with community service agencies.                                                                      |
| 17. Anggota tim kami berbagi informasi yang berhubungan dengan sumber daya komunitas.<br>Our team members share information related to community resources.                                                                                                                                              |
| 18. Janji temu pasien/klien dikoordinasikan sehingga mereka dapat bertemu beberapa pemberi layanan kesehatan dalam satu kunjungan.<br>Patient/client appointments are coordinated so they can meet multiple healthcare providers in one visit.                                                           |
| Team coordination and organization                                                                                                                                                                                                                                                                       |
| 19. Catatan kesehatan pasien/klien digunakan secara efektif oleh semua anggota tim sebagai alat komunikasi.<br>Patient/client health records are used effectively by all team members as a communication tool.                                                                                           |
| 20. Saya percaya keakuratan informasi yang dilaporkan diantara anggota tim.<br>I trust the accuracy of the information reported among team members.                                                                                                                                                      |
| 21. Ketika ada anggota tim yang tidak setuju, semua pandangan dipertimbangkan sebelum keputusan diambil.<br>When a team member disagrees, a decision is made by considering all member's views.                                                                                                          |
| 22. Informasi yang relevan berkaitan dengan perubahan status atau rencana perawatan pasien/klien dilaporkan kepada anggota tim yang sesuai dengan waktu yang tepat.<br>Relevant information related to patient/client status or treatment plans changes is reported to appropriate team members on time. |

|                                                                                                                                                                                                                                                              |
|--------------------------------------------------------------------------------------------------------------------------------------------------------------------------------------------------------------------------------------------------------------|
| <p>23. Kekhawatiran pasien/klien ditangani secara efektif melalui pertemuan rutin dan diskusi tim.<br/>Patient/client concerns are handled effectively through regular meetings and team discussions.</p>                                                    |
| <p>24. Anggota tim memiliki tanggung jawab untuk berkomunikasi dan menyediakan keahlian mereka dengan cara yang asertif.<br/>Team members have a responsibility to communicate and assertively provide their expertise.</p>                                  |
| <p>25. Terdapat kejelasan mengenai siapa yang bertanggung jawab untuk aspek-aspek dalam rencana perawatan pasien/klien.<br/>There is clarity on who is responsible for aspects of the patient/client care plan.</p>                                          |
| <p>26. Informasi yang relevan dengan rencana pelayanan kesehatan pasien diberikan kepada pasien/klien.<br/>Information relevant to the patient's health care plan is provided to the patient/client.</p>                                                     |
| <p>27. Tim kami sudah mengembangkan strategi komunikasi yang efektif untuk saling berbagi tujuan dan hasil tatalaksana pasien/klien.<br/>Our team has developed effective communication strategies to share patient/client treatment goals and outcomes.</p> |
| <p>28. Setiap anggota tim bertanggung jawab terhadap keputusan dan hasil tim.<br/>Each team member is responsible for team decisions and results.</p>                                                                                                        |
| <p>29. Anggota tim merasa nyaman dalam memberikan advokasi terkait pasien/klien.<br/>Team members feel comfortable advocating for patients/clients.</p>                                                                                                      |
| <p>30. Pertemuan tim kami memberikan kesempatan yang terbuka, nyaman dan aman untuk membahas kekhawatiran.<br/>Our team meetings provide an open, convenient and safe opportunity to discuss concerns.</p>                                                   |
| <p>31. Anggota tim bertanggung jawab terhadap pekerjaan mereka.<br/>Team members are responsible for their work.</p>                                                                                                                                         |
| <p>32. Anggota tim bertemu tatap muka dengan pasien yang dirawat oleh tim.<br/>Team members meet face-to-face with patients treated by the team.</p>                                                                                                         |
| Decision making and conflict management                                                                                                                                                                                                                      |
| <p>33. Dalam tim kami, penetapan keputusan akhir terkait pelayanan pasien/klien berada di tangan dokter.<br/>In our team, the final decision regarding patient/client care is decided by the doctor.</p>                                                     |
| <p>34. Dalam tim kami, ada masalah yang secara teratur perlu dipecahkan oleh seseorang dengan posisi yang lebih tinggi.<br/>Within our team, some problems regularly need to be solved by someone in a higher position.</p>                                  |
| Leadership                                                                                                                                                                                                                                                   |

|                                                                                                                                                                                                                                                   |
|---------------------------------------------------------------------------------------------------------------------------------------------------------------------------------------------------------------------------------------------------|
| <p>35. Pemimpin tim kami mencontohkan, menunjukkan dan mengadvokasi praktik baik yang berpusat pada pasien/klien.<br/>Our team leaders exhibit and advocate for patient/client-centered good practice.</p>                                        |
| <p>36. Kepemimpinan dalam tim menjamin bahwa peran dan tanggung jawab dalam pelayanan pasien/klien didefinisikan dengan jelas.<br/>Team leadership ensures that roles and responsibilities in inpatient/client care are clearly defined.</p>      |
| <p>37. Kepemimpinan dalam tim mendukung adanya peluang pengembangan interprofesional.<br/>Team leadership supports interprofessional development opportunities.</p>                                                                               |
| <p>38. Tim kami memiliki proses penilaian antara sejawat.<br/>Our team has a peer-to-peer assessment process.</p>                                                                                                                                 |
| <p>39. Langkah-langkah tersedia untuk mengidentifikasi dan merespon masalah secara cepat.<br/>There are some steps to identify and respond to problems fast.</p>                                                                                  |
| <p>Mission, goals and objectives</p>                                                                                                                                                                                                              |
| <p>40. Misi tim kami mewujudkan pendekatan kolaboratif interprofesional dalam pelayanan pasien/klien.<br/>Our team's mission is to embody an interprofessional collaborative approach to patient/client care.</p>                                 |
| <p>41. Tujuan tim kami jelas, bermanfaat dan sejalan dengan praktik saya.<br/>Our team goals are clear, beneficial, and related to my practice.</p>                                                                                               |
| <p>42. Tujuan utama tim kami adalah membantu pasien/klien dalam mencapai tujuan pengobatan.<br/>Our team's foremost goal is to help patients/clients achieve their treatment goals.</p>                                                           |
| <p>43. Rencana pelayanan dan tujuan pengobatan pasien/klien memasukan paduan praktik baik dari berbagai profesi.<br/>Service plans and patient/client treatment goals incorporate the integration of good practices from various professions.</p> |
| <p>44. Misi dan tujuan tim kami didukung oleh sumber daya yang cukup (keterampilan, dana, waktu, ruangan).<br/>Our team's mission and goals are supported by sufficient resources (skills, funds, time, space).</p>                               |
| <p>45. Semua anggota tim memiliki komitmen terhadap praktik kolaboratif.<br/>All team members are committed to collaborative practice.</p>                                                                                                        |
| <p>46. Anggota tim kami memiliki pemahaman yang baik mengenai rencana pelayanan dan tujuan pengobatan pasien/klien.<br/>Our team members have a good understanding of the service plan and patient/client treatment goals.</p>                    |
| <p>47. Ada keinginan nyata diantara anggota tim untuk bekerja secara kolaboratif.</p>                                                                                                                                                             |

|                                                                                                                                                                                                                                        |
|----------------------------------------------------------------------------------------------------------------------------------------------------------------------------------------------------------------------------------------|
| There is a real solicitation among team members to work collaboratively.                                                                                                                                                               |
| 48. Kepemimpinan dalam tim memastikan bahwa semua profesi yang dibutuhkan memiliki peran dalam tim.<br>Team leadership ensures that all required professions have a role in the team.                                                  |
| Patient involvement, responsibility and autonomy                                                                                                                                                                                       |
| 49. Jika pasien meminta, maka keluarga dan dukungan lain dimasukkan dalam rencana pelayanan.<br>If the patient requests, then family and other support are included in the service plan.                                               |
| 50. Pasien/klien dianggap sebagai bagian dari tim pelayanan kesehatan.<br>Patients/clients are considered part of the health care team.                                                                                                |
| 51. Anggota tim mendorong partisipasi aktif dari pasien/klien dalam membuat keputusan pelayanan.<br>Team members encourage active patient/client participation in the decision-making process.                                         |
| 52. Dokter mengambil peran sebagai penanggung jawab utama untuk keputusan dan luaran dari tim.<br>Doctors have the role of primary responsibility for the decision-making and outcomes fulfillment of the team.                        |
| 53. Para anggota tim mengakui aspek pelayanan dimana anggota profesi saya memiliki lebih banyak keterampilan dan keahlian.<br>Team members recognize aspects of service where members of my profession have more skills and expertise. |

Likert scale categories: Strongly agree: 5, Agree: 4, Neutral: 3, Disagree: 2, Strongly disagree: 1
